# Supplementary material for: Outcome reporting recommendations for clinical trial protocols and reports: a scoping review
Source: Springer Nature journal article supplement (doi:10.1186/s13063-020-04440-w), 2020-07-08
Supplement: MOESM5 [file 18159624]

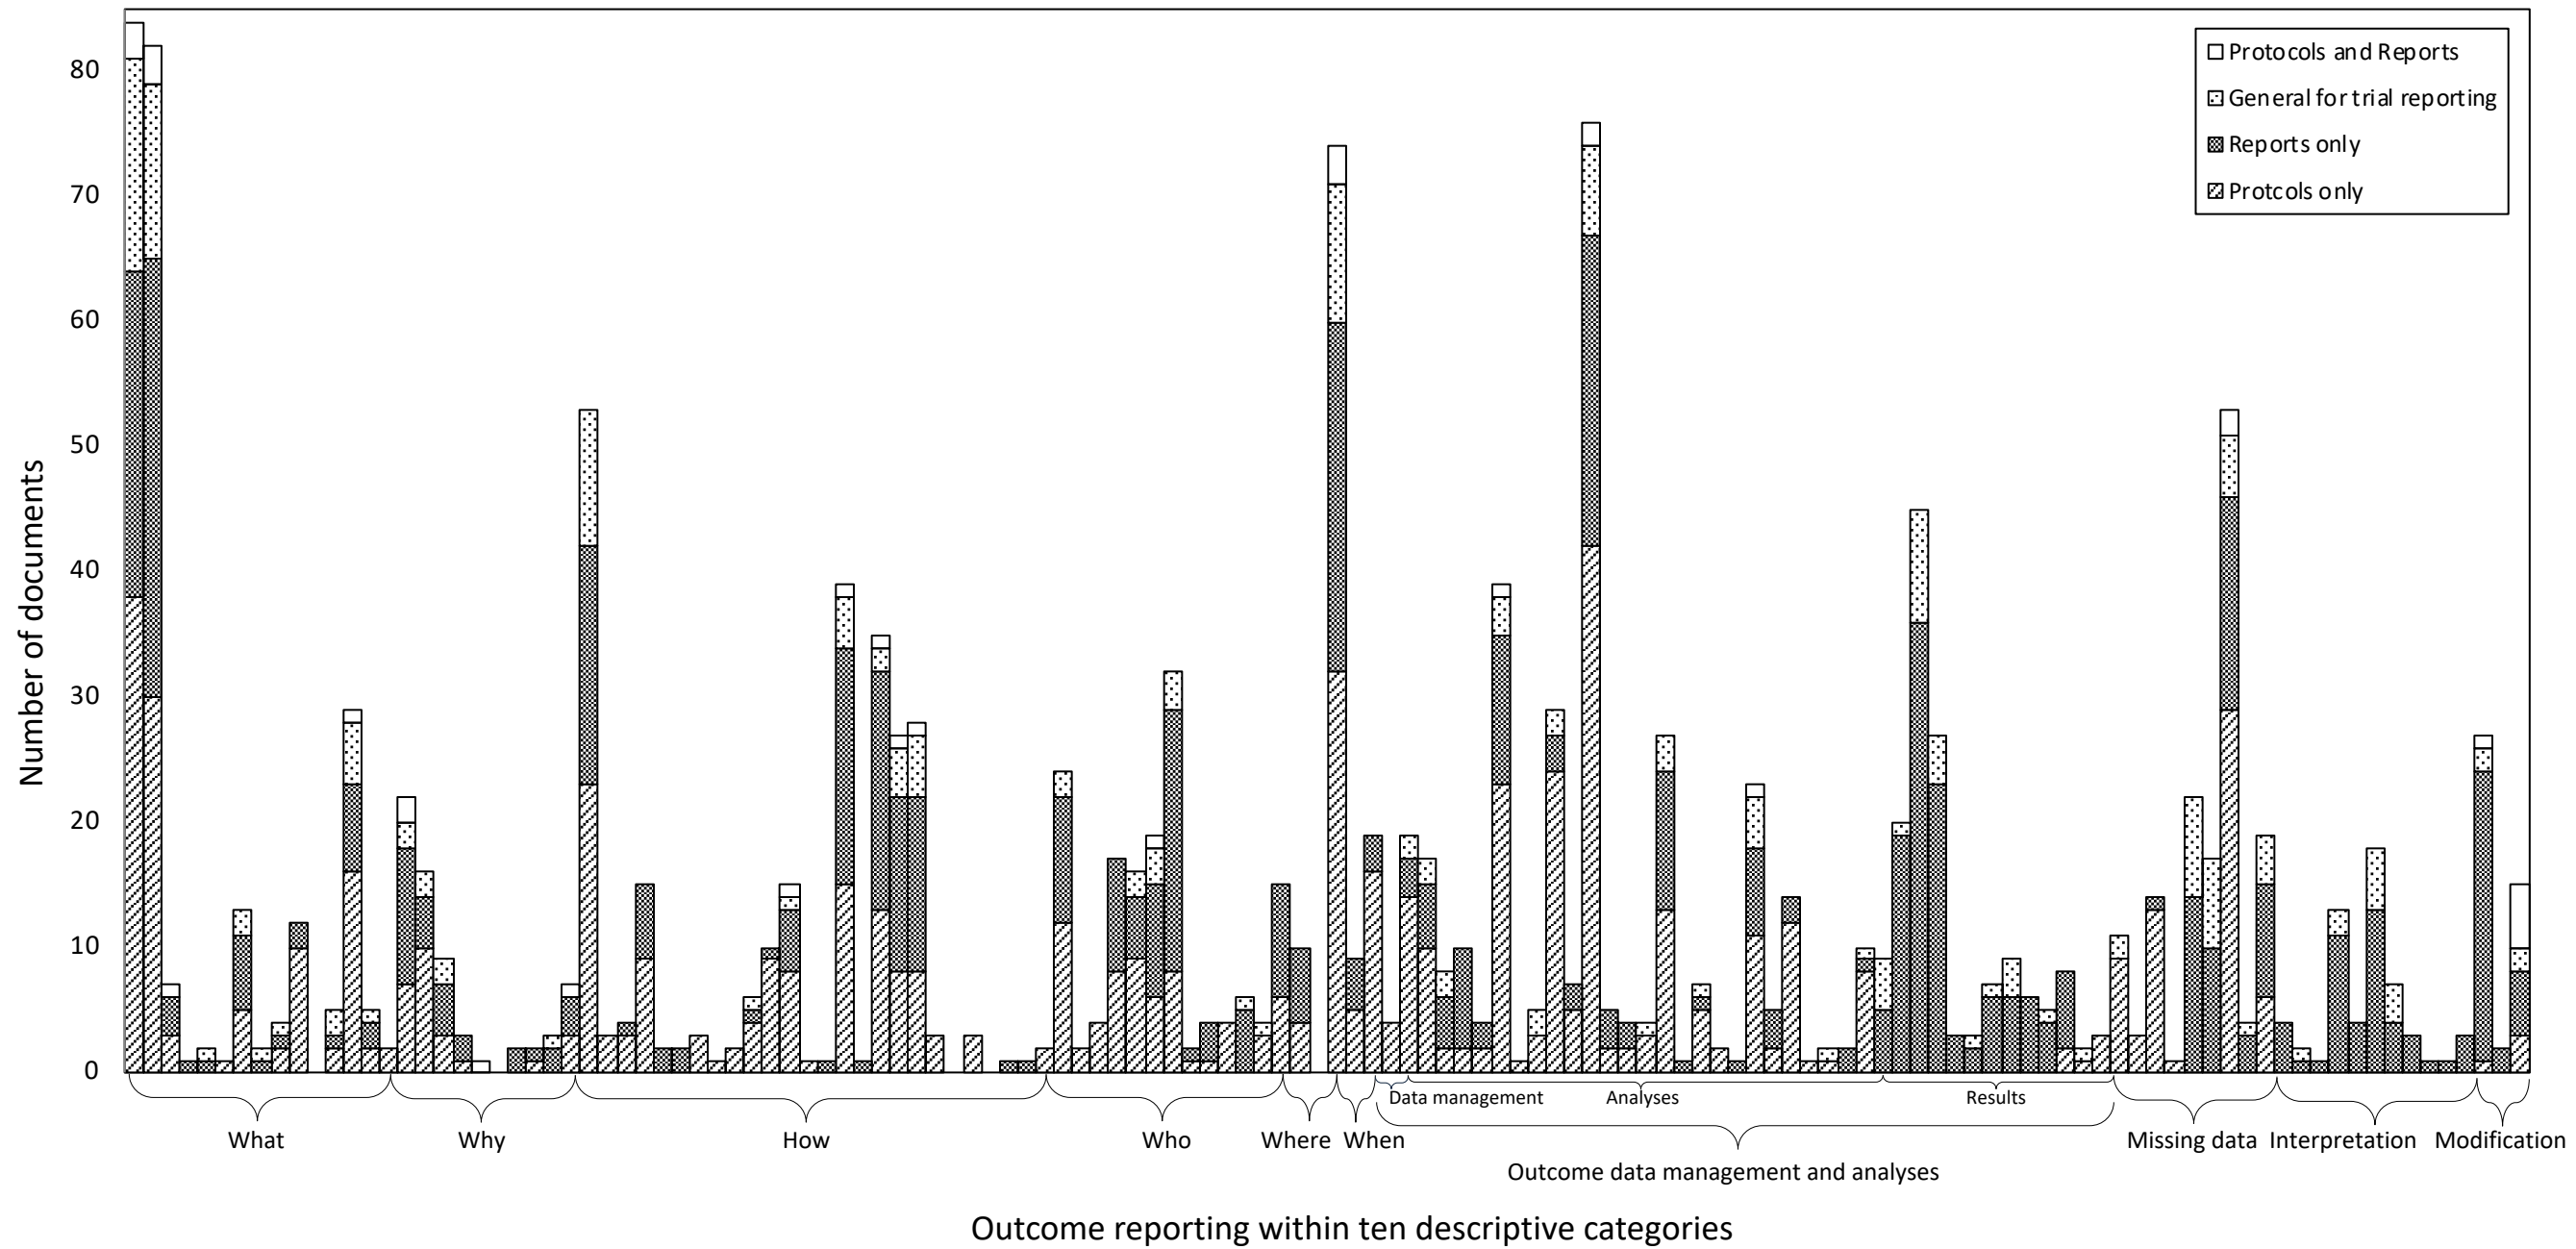

Additional file 5. eFigure 1. Number of documents containing an outcome reporting recommendation supporting each of the 132 candidate outcome reporting items. Bars correspond with ordered items listed in Table 4
